# Supplementary material for: Insight into the lncRNA–mRNA Co-Expression Profile and ceRNA Network in Lipopolysaccharide-Induced Acute Lung Injury
Source: MDPI journal article supplement (doi:10.3390/cimb45070389), 2023-07-24
Supplement: s1 [file s1]

**Supplementary Table S1** The primers of lncRNAs and mRNAs

| Gene ID         | Forward primer (5'-3')  | Reverse primer (5'-3')   |
|-----------------|-------------------------|--------------------------|
| ENST00000627824 | GAATTTGGCAGACAGGATGG    | ACTCCTGTATCTTTCCCAGG     |
| ENST00000642173 | ACAGTAGCACAACGAGGAG     | AGAGATGGTGCAAAGACCC      |
| ENST00000608576 | GAGACCAGATGTTTGAAGCTG   | GCAATCAAGTGGCTAGTTCC     |
| NR_024462.1     | ATACCAGCTGATGTCAGTCC    | CACCTTCTTCCTTCTCCCG      |
| ENST00000432142 | CTGCAGCCTCAAATTCCTG     | GGGTTATTTGGAGCTGTAGTC    |
| IL-1 $\beta$    | ATGATGGCTTATTACAGTGGCAA | GTCGGAGATTTCGTAGCTGGA    |
| IL-6            | ACTCACCTCTTCAGAACGAATTG | CCATCTTTGGAAGGTTTCAGGTTG |
| CXCL8           | ACTGAGAGTGATTGAGAGTGGAC | AACCCTCTGCACCCAGTTTTTC   |

**Supplementary Table S2** Differentially expressed lncRNAs

| lncRNA_id       | FoldChange | log2FoldChange | pValue   | qValue   | Regulation |
|-----------------|------------|----------------|----------|----------|------------|
| ENST00000316786 | 4.369709   | 2.127537       | 0.041437 | 0.999158 | Up         |
| ENST00000331787 | 0.031839   | -4.97308       | 0.028905 | 0.999158 | Down       |
| ENST00000355869 | 0.071286   | -3.81024       | 0.046764 | 0.999158 | Down       |
| ENST00000356906 | 1.886609   | 0.915795       | 0.0142   | 0.866453 | Up         |
| ENST00000366189 | 0.069264   | -3.85174       | 1.92E-06 | 0.002962 | Down       |
| ENST00000366253 | 13.23298   | 3.726066       | 0.012049 | 0.832721 | Up         |
| ENST00000394864 | 31.79905   | 4.990912       | 0.005734 | 0.678873 | Up         |
| ENST00000412422 | 0.292954   | -1.77125       | 0.015348 | 0.886575 | Down       |
| ENST00000412685 | 0.497342   | -1.00769       | 0.024275 | 0.999158 | Down       |
| ENST00000413945 | 0.036525   | -4.77498       | 0.03181  | 0.999158 | Down       |
| ENST00000422022 | 0.039306   | -4.66909       | 0.003032 | 0.549611 | Down       |
| ENST00000422408 | 0.453294   | -1.14148       | 0.026419 | 0.999158 | Down       |
| ENST00000423530 | 0.035752   | -4.80584       | 0.04065  | 0.999158 | Down       |
| ENST00000425800 | 0.02717    | -5.20183       | 0.013091 | 0.852565 | Down       |
| ENST00000426635 | 2284205    | 21.12326       | 6.53E-08 | 0.000263 | Up         |
| ENST00000428716 | 0.015827   | -5.98149       | 0.018522 | 0.919714 | Down       |
| ENST00000429871 | 32.79592   | 5.035444       | 0.018624 | 0.919714 | Up         |
| ENST00000431268 | 1.562384   | 0.643749       | 0.02607  | 0.999158 | Up         |
| ENST00000432139 | 0.115888   | -3.1092        | 0.037164 | 0.999158 | Down       |
| ENST00000432142 | 0.248507   | -2.00864       | 0.027249 | 0.999158 | Down       |
| ENST00000432530 | 0.16325    | -2.61484       | 0.036328 | 0.999158 | Down       |
| ENST00000432783 | 0.063944   | -3.96705       | 0.033651 | 0.999158 | Down       |
| ENST00000434244 | 2.038009   | 1.02716        | 0.011469 | 0.823687 | Up         |
| ENST00000434872 | 0.011279   | -6.47027       | 0.048812 | 0.999158 | Down       |
| ENST00000436286 | 0.413331   | -1.27463       | 0.023739 | 0.999158 | Down       |
| ENST00000438107 | 0.04957    | -4.33439       | 0.045819 | 0.999158 | Down       |
| ENST00000438412 | 18.53885   | 4.21248        | 0.005832 | 0.679104 | Up         |

|                 |          |          |          |          |      |
|-----------------|----------|----------|----------|----------|------|
| ENST00000439670 | 1.736276 | 0.795996 | 0.023115 | 0.993627 | Up   |
| ENST00000441971 | 0.029097 | -5.10298 | 0.014508 | 0.866453 | Down |
| ENST00000442067 | 59.60898 | 5.897458 | 0.033892 | 0.999158 | Up   |
| ENST00000442726 | 0.102153 | -3.2912  | 0.000455 | 0.18602  | Down |
| ENST00000443467 | 3.087331 | 1.62636  | 0.015294 | 0.886575 | Up   |
| ENST00000443947 | 19.83506 | 4.309981 | 0.003647 | 0.55619  | Up   |
| ENST00000444375 | 18.61323 | 4.218256 | 0.003946 | 0.566753 | Up   |
| ENST00000444470 | 2.224562 | 1.153521 | 0.009148 | 0.787987 | Up   |
| ENST00000444816 | 220.418  | 7.784098 | 0.046444 | 0.999158 | Up   |
| ENST00000445466 | 116.0851 | 6.859039 | 0.02973  | 0.999158 | Up   |
| ENST00000447019 | 4.843216 | 2.275965 | 0.036093 | 0.999158 | Up   |
| ENST00000447329 | 17.18505 | 4.103082 | 0.022249 | 0.985423 | Up   |
| ENST00000447413 | 2.428677 | 1.28017  | 0.017666 | 0.919714 | Up   |
| ENST00000447959 | 7.034468 | 2.814441 | 0.009777 | 0.789566 | Up   |
| ENST00000448126 | 0.036702 | -4.768   | 0.035324 | 0.999158 | Down |
| ENST00000451884 | 28.07713 | 4.811324 | 0.031061 | 0.999158 | Up   |
| ENST00000452057 | 1.689254 | 0.756386 | 0.037538 | 0.999158 | Up   |
| ENST00000452659 | 0.237116 | -2.07633 | 0.046629 | 0.999158 | Down |
| ENST00000453136 | 0.103803 | -3.26807 | 0.018829 | 0.919714 | Down |
| ENST00000454996 | 0.012251 | -6.35094 | 0.000505 | 0.18602  | Down |
| ENST00000455395 | 6.020022 | 2.589769 | 0.04659  | 0.999158 | Up   |
| ENST00000455424 | 0.611314 | -0.71001 | 0.049908 | 0.999158 | Down |
| ENST00000457084 | 0.649942 | -0.62162 | 0.047035 | 0.999158 | Down |
| ENST00000458392 | 1.683049 | 0.751077 | 0.047098 | 0.999158 | Up   |
| ENST00000474814 | 1.671285 | 0.740958 | 0.008653 | 0.778009 | Up   |
| ENST00000477192 | 0.333467 | -1.58439 | 0.044935 | 0.999158 | Down |
| ENST00000485071 | 0.566598 | -0.8196  | 0.035835 | 0.999158 | Down |
| ENST00000485898 | 0.336826 | -1.56993 | 0.038245 | 0.999158 | Down |
| ENST00000488315 | 8.181428 | 3.032353 | 0.025142 | 0.999158 | Up   |
| ENST00000495430 | 0.41418  | -1.27167 | 0.031268 | 0.999158 | Down |
| ENST00000499326 | 0.013134 | -6.25056 | 0.000199 | 0.116859 | Down |
| ENST00000499809 | 0.025345 | -5.30217 | 0.001157 | 0.296785 | Down |
| ENST00000501937 | 2.053963 | 1.03841  | 0.039815 | 0.999158 | Up   |
| ENST00000503797 | 0.341011 | -1.55211 | 0.00366  | 0.55619  | Down |
| ENST00000505709 | 0.073441 | -3.76727 | 0.027563 | 0.999158 | Down |
| ENST00000507558 | 28.0929  | 4.812134 | 0.035755 | 0.999158 | Up   |
| ENST00000508913 | 0.132345 | -2.91763 | 0.004504 | 0.58394  | Down |
| ENST00000509080 | 0.014969 | -6.06184 | 0.002317 | 0.479941 | Down |
| ENST00000513393 | 0.448721 | -1.15611 | 0.025716 | 0.999158 | Down |
| ENST00000514984 | 16.3973  | 4.035386 | 0.026644 | 0.999158 | Up   |
| ENST00000517747 | 65.15372 | 6.025776 | 0.033835 | 0.999158 | Up   |

|                 |          |          |          |          |      |
|-----------------|----------|----------|----------|----------|------|
| ENST00000518105 | 0.517314 | -0.95089 | 0.033485 | 0.999158 | Down |
| ENST00000518172 | 63.44514 | 5.987438 | 0.035639 | 0.999158 | Up   |
| ENST00000518639 | 1.544571 | 0.627207 | 0.044342 | 0.999158 | Up   |
| ENST00000522183 | 0.053355 | -4.22824 | 0.02564  | 0.999158 | Down |
| ENST00000523068 | 0.386733 | -1.37059 | 0.023849 | 0.999158 | Down |
| ENST00000523354 | 1.572618 | 0.653168 | 0.018065 | 0.919714 | Up   |
| ENST00000523643 | 28.5887  | 4.837373 | 0.000656 | 0.208568 | Up   |
| ENST00000523871 | 0.471215 | -1.08554 | 0.038266 | 0.999158 | Down |
| ENST00000524964 | 3.122694 | 1.642791 | 0.045197 | 0.999158 | Up   |
| ENST00000525575 | 0.25693  | -1.96055 | 0.008566 | 0.778009 | Down |
| ENST00000526453 | 2.645006 | 1.403271 | 0.0061   | 0.688514 | Up   |
| ENST00000526807 | 0.429937 | -1.2178  | 0.021844 | 0.985423 | Down |
| ENST00000527128 | 0.539861 | -0.88934 | 0.045386 | 0.999158 | Down |
| ENST00000532845 | 8.170761 | 3.030471 | 0.040294 | 0.999158 | Up   |
| ENST00000533615 | 0.030056 | -5.05622 | 0.023968 | 0.999158 | Down |
| ENST00000534671 | 0.013626 | -6.19748 | 0.018209 | 0.919714 | Down |
| ENST00000535076 | 0.411655 | -1.28049 | 0.019929 | 0.937551 | Down |
| ENST00000540904 | 42.61358 | 5.413241 | 0.003203 | 0.549611 | Up   |
| ENST00000547441 | 0.204169 | -2.29216 | 0.022218 | 0.985423 | Down |
| ENST00000549734 | 0.350117 | -1.51409 | 0.013072 | 0.852565 | Down |
| ENST00000549804 | 1.535487 | 0.618696 | 0.022061 | 0.985423 | Up   |
| ENST00000550135 | 0.58565  | -0.77189 | 0.043583 | 0.999158 | Down |
| ENST00000551077 | 4.033615 | 2.012073 | 0.048587 | 0.999158 | Up   |
| ENST00000552532 | 0.078789 | -3.66586 | 0.013454 | 0.852565 | Down |
| ENST00000553657 | 85.28581 | 6.414234 | 0.008078 | 0.778009 | Up   |
| ENST00000553829 | 0.477916 | -1.06517 | 0.042313 | 0.999158 | Down |
| ENST00000554036 | 6.115054 | 2.612365 | 0.039395 | 0.999158 | Up   |
| ENST00000559298 | 48.7774  | 5.608141 | 0.013928 | 0.866453 | Up   |
| ENST00000559299 | 0.44762  | -1.15965 | 0.047265 | 0.999158 | Down |
| ENST00000559825 | 0.267265 | -1.90366 | 0.010491 | 0.799261 | Down |
| ENST00000559920 | 0.390656 | -1.35603 | 0.015389 | 0.886575 | Down |
| ENST00000561881 | 0.474061 | -1.07686 | 0.038713 | 0.999158 | Down |
| ENST00000563320 | 0.217878 | -2.19841 | 0.006217 | 0.690437 | Down |
| ENST00000566898 | 26.67646 | 4.737495 | 0.030802 | 0.999158 | Up   |
| ENST00000567769 | 0.516696 | -0.95261 | 0.012147 | 0.832721 | Down |
| ENST00000568827 | 0.239282 | -2.06322 | 0.019807 | 0.935897 | Down |
| ENST00000568911 | 0.61995  | -0.68978 | 0.00458  | 0.58394  | Down |
| ENST00000569920 | 4.712882 | 2.23661  | 0.01338  | 0.852565 | Up   |
| ENST00000572358 | 0.502849 | -0.9918  | 0.03784  | 0.999158 | Down |
| ENST00000574741 | 2.283328 | 1.191138 | 0.028949 | 0.999158 | Up   |
| ENST00000576232 | 10.89628 | 3.445764 | 0.000767 | 0.223186 | Up   |

|                 |          |          |          |          |      |
|-----------------|----------|----------|----------|----------|------|
| ENST00000576749 | 0.014366 | -6.12118 | 0.000341 | 0.152884 | Down |
| ENST00000577066 | 3.066246 | 1.616474 | 0.002204 | 0.474874 | Up   |
| ENST00000579781 | 0.020026 | -5.64198 | 0.004078 | 0.578026 | Down |
| ENST00000582452 | 26.54278 | 4.730248 | 0.032052 | 0.999158 | Up   |
| ENST00000582549 | 48.62788 | 5.603712 | 0.046359 | 0.999158 | Up   |
| ENST00000586452 | 28.10148 | 4.812574 | 0.046126 | 0.999158 | Up   |
| ENST00000586974 | 0.018051 | -5.79177 | 0.026683 | 0.999158 | Down |
| ENST00000592404 | 46.9865  | 5.554174 | 0.007155 | 0.741156 | Up   |
| ENST00000593960 | 0.011247 | -6.47434 | 0.018035 | 0.919714 | Down |
| ENST00000594557 | 0.271556 | -1.88068 | 0.033138 | 0.999158 | Down |
| ENST00000594764 | 0.209084 | -2.25785 | 0.029321 | 0.999158 | Down |
| ENST00000596663 | 0.244875 | -2.02988 | 0.037763 | 0.999158 | Down |
| ENST00000597894 | 33.44412 | 5.063681 | 0.013429 | 0.852565 | Up   |
| ENST00000597946 | 0.083114 | -3.58876 | 0.003306 | 0.549611 | Down |
| ENST00000598139 | 7.463705 | 2.899892 | 0.000711 | 0.212827 | Up   |
| ENST00000599276 | 0.034608 | -4.85275 | 0.043018 | 0.999158 | Down |
| ENST00000599448 | 0.148532 | -2.75115 | 0.008666 | 0.778009 | Down |
| ENST00000599756 | 0.510485 | -0.97006 | 0.003457 | 0.555782 | Down |
| ENST00000601801 | 0.109263 | -3.19413 | 9.68E-05 | 0.074462 | Down |
| ENST00000602429 | 0.410497 | -1.28456 | 0.01267  | 0.842579 | Down |
| ENST00000602546 | 0.04127  | -4.59875 | 0.000809 | 0.22932  | Down |
| ENST00000602573 | 1.876346 | 0.907926 | 0.019007 | 0.920628 | Up   |
| ENST00000602718 | 0.240086 | -2.05837 | 0.029167 | 0.999158 | Down |
| ENST00000602802 | 3.432074 | 1.779081 | 0.007771 | 0.768055 | Up   |
| ENST00000602810 | 6.846941 | 2.77546  | 0.024253 | 0.999158 | Up   |
| ENST00000602827 | 0.616369 | -0.69813 | 0.04027  | 0.999158 | Down |
| ENST00000602889 | 2.524135 | 1.335789 | 0.046626 | 0.999158 | Up   |
| ENST00000604346 | 0.081825 | -3.61131 | 0.000581 | 0.201842 | Down |
| ENST00000604397 | 0.634379 | -0.65658 | 0.006599 | 0.711004 | Down |
| ENST00000604669 | 0.358483 | -1.48002 | 0.027483 | 0.999158 | Down |
| ENST00000605811 | 54.72967 | 5.774251 | 0.027394 | 0.999158 | Up   |
| ENST00000606243 | 94.71213 | 6.565477 | 0.000518 | 0.18602  | Up   |
| ENST00000606424 | 10.74831 | 3.426039 | 0.026758 | 0.999158 | Up   |
| ENST00000606818 | 0.027557 | -5.18146 | 0.017597 | 0.919714 | Down |
| ENST00000606908 | 2.312849 | 1.209671 | 0.009918 | 0.789566 | Up   |
| ENST00000607056 | 1.904685 | 0.929552 | 0.000239 | 0.116859 | Up   |
| ENST00000607861 | 8.66375  | 3.114992 | 0.048689 | 0.999158 | Up   |
| ENST00000607902 | 2.804564 | 1.487776 | 0.039209 | 0.999158 | Up   |
| ENST00000608314 | 0.03324  | -4.91094 | 0.001254 | 0.307042 | Down |
| ENST00000608576 | 0.255115 | -1.97078 | 0.012392 | 0.839586 | Down |
| ENST00000608748 | 38.28505 | 5.258709 | 0.00954  | 0.789566 | Up   |

|                 |          |          |          |          |      |
|-----------------|----------|----------|----------|----------|------|
| ENST00000608826 | 0.632604 | -0.66063 | 0.014818 | 0.871053 | Down |
| ENST00000609027 | 4.449298 | 2.153578 | 0.018867 | 0.919714 | Up   |
| ENST00000609218 | 2.85717  | 1.514587 | 0.042645 | 0.999158 | Up   |
| ENST00000609619 | 11.84962 | 3.566769 | 0.022319 | 0.985423 | Up   |
| ENST00000609651 | 0.203707 | -2.29543 | 0.027941 | 0.999158 | Down |
| ENST00000609803 | 2.302422 | 1.203152 | 0.014493 | 0.866453 | Up   |
| ENST00000610395 | 45.74791 | 5.515634 | 0.026111 | 0.999158 | Up   |
| ENST00000610631 | 0.034838 | -4.84318 | 0.025772 | 0.999158 | Down |
| ENST00000610658 | 0.038549 | -4.69718 | 0.008288 | 0.778009 | Down |
| ENST00000610681 | 0.361781 | -1.46681 | 0.002013 | 0.451707 | Down |
| ENST00000611056 | 7.315628 | 2.870982 | 0.030424 | 0.999158 | Up   |
| ENST00000615718 | 0.158156 | -2.66058 | 0.032872 | 0.999158 | Down |
| ENST00000615897 | 15.38797 | 3.943731 | 0.005902 | 0.679104 | Up   |
| ENST00000617260 | 0.035711 | -4.8075  | 0.010609 | 0.799261 | Down |
| ENST00000617932 | 0.5715   | -0.80717 | 0.049843 | 0.999158 | Down |
| ENST00000618186 | 0.014978 | -6.06105 | 0.015981 | 0.901389 | Down |
| ENST00000618272 | 0.116655 | -3.09969 | 0.014877 | 0.871053 | Down |
| ENST00000618736 | 0.61133  | -0.70998 | 0.004391 | 0.58394  | Down |
| ENST00000618809 | 24.40642 | 4.609189 | 0.028993 | 0.999158 | Up   |
| ENST00000619147 | 31.48994 | 4.976819 | 0.009216 | 0.787987 | Up   |
| ENST00000620465 | 38.73665 | 5.275627 | 4.27E-05 | 0.045984 | Up   |
| ENST00000621088 | 48.00298 | 5.585052 | 0.006135 | 0.688514 | Up   |
| ENST00000621354 | 2.052074 | 1.037083 | 0.026021 | 0.999158 | Up   |
| ENST00000621901 | 5.52565  | 2.466144 | 0.038057 | 0.999158 | Up   |
| ENST00000622688 | 134.1645 | 7.067859 | 0.022622 | 0.990691 | Up   |
| ENST00000622889 | 5.037168 | 2.332613 | 0.045148 | 0.999158 | Up   |
| ENST00000622921 | 17.59176 | 4.136828 | 0.011193 | 0.816987 | Up   |
| ENST00000623199 | 0.588845 | -0.76404 | 0.010183 | 0.789566 | Down |
| ENST00000623980 | 7.658051 | 2.936977 | 0.007282 | 0.747167 | Up   |
| ENST00000624140 | 0.032317 | -4.95155 | 0.000432 | 0.18602  | Down |
| ENST00000624215 | 0.112854 | -3.14748 | 0.020624 | 0.953562 | Down |
| ENST00000624919 | 0.524118 | -0.93204 | 0.007645 | 0.764102 | Down |
| ENST00000626089 | 0.354877 | -1.49461 | 0.049713 | 0.999158 | Down |
| ENST00000626286 | 0.180254 | -2.4719  | 0.027947 | 0.999158 | Down |
| ENST00000627155 | 0.017597 | -5.8285  | 0.002567 | 0.521857 | Down |
| ENST00000627767 | 0.426087 | -1.23078 | 0.012481 | 0.840347 | Down |
| ENST00000627824 | 2.401905 | 1.264179 | 0.000638 | 0.208568 | Up   |
| ENST00000628234 | 7.844014 | 2.971592 | 0.017856 | 0.919714 | Up   |
| ENST00000629474 | 0.02697  | -5.21252 | 0.01846  | 0.919714 | Down |
| ENST00000631832 | 6.115826 | 2.612547 | 0.024084 | 0.999158 | Up   |
| ENST00000632346 | 1.648084 | 0.72079  | 0.009136 | 0.787987 | Up   |

|                 |          |          |          |          |      |
|-----------------|----------|----------|----------|----------|------|
| ENST00000634535 | 0.297077 | -1.75109 | 0.010598 | 0.799261 | Down |
| ENST00000635091 | 0.037017 | -4.75568 | 0.039223 | 0.999158 | Down |
| ENST00000635600 | 0.269278 | -1.89283 | 0.022312 | 0.985423 | Down |
| ENST00000637973 | 0.020977 | -5.57506 | 0.047651 | 0.999158 | Down |
| ENST00000638682 | 0.472384 | -1.08197 | 0.028351 | 0.999158 | Down |
| ENST00000639773 | 3.147999 | 1.654435 | 0.035372 | 0.999158 | Up   |
| ENST00000641757 | 0.121139 | -3.04526 | 0.016867 | 0.910542 | Down |
| ENST00000642135 | 0.393838 | -1.34433 | 0.035386 | 0.999158 | Down |
| ENST00000642173 | 8.47123  | 3.082571 | 0.004316 | 0.58394  | Up   |
| ENST00000642872 | 0.532044 | -0.91038 | 0.008489 | 0.778009 | Down |
| ENST00000643135 | 2.867378 | 1.519732 | 0.034884 | 0.999158 | Up   |
| ENST00000643280 | 49.82364 | 5.638759 | 0.003681 | 0.55619  | Up   |
| ENST00000643616 | 12.13492 | 3.601093 | 0.020913 | 0.962533 | Up   |
| ENST00000643866 | 2.226773 | 1.154954 | 0.035732 | 0.999158 | Up   |
| ENST00000644040 | 0.303364 | -1.72088 | 0.02617  | 0.999158 | Down |
| ENST00000645023 | 0.468788 | -1.09299 | 0.014261 | 0.866453 | Down |
| ENST00000645656 | 0.406802 | -1.2976  | 0.044991 | 0.999158 | Down |
| ENST00000646488 | 29.14219 | 4.865037 | 0.033758 | 0.999158 | Up   |
| ENST00000646636 | 6.215326 | 2.63583  | 0.016392 | 0.910542 | Up   |
| ENST00000647325 | 0.068002 | -3.87828 | 0.035707 | 0.999158 | Down |
| ENST00000647354 | 1.504947 | 0.589713 | 0.010921 | 0.811387 | Up   |
| ENST00000647652 | 0.420802 | -1.24879 | 0.041894 | 0.999158 | Down |
| ENST00000648279 | 0.191606 | -2.38378 | 0.000114 | 0.08219  | Down |
| ENST00000648347 | 0.349218 | -1.5178  | 0.043351 | 0.999158 | Down |
| ENST00000649025 | 2.197061 | 1.135575 | 0.030001 | 0.999158 | Up   |
| ENST00000649087 | 0.257203 | -1.95902 | 0.011096 | 0.816987 | Down |
| ENST00000649291 | 0.301179 | -1.73131 | 6.53E-05 | 0.05409  | Down |
| ENST00000649712 | 0.107257 | -3.22086 | 0.044427 | 0.999158 | Down |
| ENST00000650227 | 0.181403 | -2.46273 | 0.02544  | 0.999158 | Down |
| ENST00000650291 | 0.091089 | -3.45658 | 0.01355  | 0.853632 | Down |
| ENST00000650438 | 11.34764 | 3.50432  | 0.03707  | 0.999158 | Up   |
| ENST00000650930 | 0.284159 | -1.81523 | 0.032075 | 0.999158 | Down |
| ENST00000651229 | 8.142283 | 3.025433 | 0.000667 | 0.208568 | Up   |
| ENST00000651519 | 1.561136 | 0.642596 | 0.038107 | 0.999158 | Up   |
| ENST00000651660 | 0.494324 | -1.01647 | 0.019399 | 0.920628 | Down |
| ENST00000652038 | 0.166301 | -2.58813 | 0.015544 | 0.887144 | Down |
| ENST00000652378 | 0.074835 | -3.74015 | 0.004268 | 0.58394  | Down |
| ENST00000652709 | 12.83915 | 3.682477 | 0.015751 | 0.893088 | Up   |
| ENST00000652746 | 0.059447 | -4.07224 | 0.003366 | 0.549611 | Down |
| NR_001568.1     | 0.209736 | -2.25335 | 0.018646 | 0.919714 | Down |
| NR_003697.2     | 1.593462 | 0.672165 | 0.045111 | 0.999158 | Up   |

|             |          |          |          |          |      |
|-------------|----------|----------|----------|----------|------|
| NR_015395.2 | 1.730403 | 0.791108 | 0.005389 | 0.659765 | Up   |
| NR_022006.1 | 2.514944 | 1.330526 | 0.013379 | 0.852565 | Up   |
| NR_023915.1 | 0.323932 | -1.62624 | 0.000474 | 0.18602  | Down |
| NR_024053.2 | 6.722711 | 2.749043 | 0.002855 | 0.539616 | Up   |
| NR_024236.1 | 0.208304 | -2.26324 | 0.014743 | 0.871053 | Down |
| NR_024284.1 | 109.9079 | 6.780151 | 0.011224 | 0.816987 | Up   |
| NR_024462.1 | 0.320312 | -1.64245 | 0.004369 | 0.58394  | Down |
| NR_024497.2 | 2.441659 | 1.287862 | 0.038197 | 0.999158 | Up   |
| NR_026807.2 | 0.494324 | -1.01647 | 0.019399 | 0.920628 | Down |
| NR_026988.1 | 58.84536 | 5.878857 | 0.009873 | 0.789566 | Up   |
| NR_027055.1 | 54.24859 | 5.761514 | 0.00325  | 0.549611 | Up   |
| NR_027159.1 | 0.14028  | -2.83362 | 0.009551 | 0.789566 | Down |
| NR_027295.2 | 0.195045 | -2.35812 | 0.022869 | 0.993627 | Down |
| NR_029376.1 | 0.197744 | -2.33829 | 0.043248 | 0.999158 | Down |
| NR_033319.2 | 0.507082 | -0.97971 | 0.04528  | 0.999158 | Down |
| NR_033827.1 | 2.554995 | 1.35332  | 0.034562 | 0.999158 | Up   |
| NR_033893.1 | 0.110616 | -3.17637 | 0.009886 | 0.789566 | Down |
| NR_034115.1 | 4.622333 | 2.208621 | 0.02593  | 0.999158 | Up   |
| NR_036527.1 | 0.281223 | -1.83022 | 0.049974 | 0.999158 | Down |
| NR_036549.1 | 0.460226 | -1.11959 | 0.042604 | 0.999158 | Down |
| NR_037601.1 | 0.6042   | -0.7269  | 0.030925 | 0.999158 | Down |
| NR_037616.1 | 5.441473 | 2.443997 | 0.003561 | 0.55619  | Up   |
| NR_038228.1 | 12.2195  | 3.611113 | 0.000157 | 0.099259 | Up   |
| NR_038276.1 | 0.607834 | -0.71825 | 0.04711  | 0.999158 | Down |
| NR_038281.1 | 0.120905 | -3.04806 | 0.021    | 0.962533 | Down |
| NR_038291.1 | 1.635673 | 0.709884 | 0.028605 | 0.999158 | Up   |
| NR_038292.1 | 3.611263 | 1.852504 | 6.42E-05 | 0.05409  | Up   |
| NR_038345.1 | 0.010646 | -6.55351 | 0.015564 | 0.887144 | Down |
| NR_038448.1 | 0.458447 | -1.12517 | 0.008403 | 0.778009 | Down |
| NR_038460.2 | 0.386936 | -1.36983 | 0.034948 | 0.999158 | Down |
| NR_038879.1 | 0.129757 | -2.94611 | 0.001736 | 0.406622 | Down |
| NR_038971.1 | 0.388954 | -1.36233 | 0.00382  | 0.55619  | Down |
| NR_038988.2 | 0.007425 | -7.0733  | 1.60E-05 | 0.021543 | Down |
| NR_039983.2 | 0.574191 | -0.8004  | 0.022242 | 0.985423 | Down |
| NR_040037.1 | 0.17079  | -2.5497  | 0.044399 | 0.999158 | Down |
| NR_040055.1 | 12.88143 | 3.687221 | 0.003329 | 0.549611 | Up   |
| NR_045021.1 | 0.018034 | -5.79317 | 0.038406 | 0.999158 | Down |
| NR_046089.1 | 0.019651 | -5.66923 | 0.046448 | 0.999158 | Down |
| NR_046542.1 | 0.061181 | -4.03076 | 0.005588 | 0.668923 | Down |
| NR_047532.1 | 4.268785 | 2.093825 | 0.025837 | 0.999158 | Up   |
| NR_047539.1 | 148.5418 | 7.214725 | 5.72E-07 | 0.001028 | Up   |

|             |          |          |          |          |      |
|-------------|----------|----------|----------|----------|------|
| NR_047540.1 | 0.343338 | -1.5423  | 0.030382 | 0.999158 | Down |
| NR_103456.1 | 0.15868  | -2.65581 | 0.000232 | 0.116859 | Down |
| NR_104014.2 | 0.189701 | -2.3982  | 0.033368 | 0.999158 | Down |
| NR_104183.1 | 0.101355 | -3.30252 | 0.037752 | 0.999158 | Down |
| NR_109832.1 | 0.013643 | -6.1957  | 0.012594 | 0.842579 | Down |
| NR_109909.1 | 11.46838 | 3.51959  | 0.025537 | 0.999158 | Up   |
| NR_110016.1 | 0.033816 | -4.88615 | 0.03247  | 0.999158 | Down |
| NR_110090.1 | 3.746194 | 1.905426 | 0.010456 | 0.799261 | Up   |
| NR_110097.1 | 18.86858 | 4.237914 | 0.016859 | 0.910542 | Up   |
| NR_110456.2 | 0.543979 | -0.87838 | 0.031867 | 0.999158 | Down |
| NR_110625.1 | 28.04646 | 4.809747 | 0.035281 | 0.999158 | Up   |
| NR_110688.2 | 0.500642 | -0.99815 | 0.010829 | 0.810165 | Down |
| NR_110725.1 | 0.077794 | -3.68419 | 0.036273 | 0.999158 | Down |
| NR_110787.1 | 0.155066 | -2.68905 | 0.000226 | 0.116859 | Down |
| NR_110917.1 | 0.042942 | -4.54148 | 0.034835 | 0.999158 | Down |
| NR_119377.1 | 0.422279 | -1.24373 | 0.019381 | 0.920628 | Down |
| NR_120363.1 | 0.274609 | -1.86455 | 0.013964 | 0.866453 | Down |
| NR_121614.1 | 2.203926 | 1.140076 | 0.00962  | 0.789566 | Up   |
| NR_122070.1 | 0.089168 | -3.48733 | 0.040613 | 0.999158 | Down |
| NR_122124.1 | 4.71408  | 2.236976 | 0.026591 | 0.999158 | Up   |
| NR_125885.1 | 0.02899  | -5.10831 | 0.017539 | 0.919714 | Down |
| NR_125906.1 | 0.29649  | -1.75394 | 0.007001 | 0.739247 | Down |
| NR_126448.1 | 1.907213 | 0.931466 | 0.025183 | 0.999158 | Up   |
| NR_130728.1 | 11.34601 | 3.504114 | 0.035034 | 0.999158 | Up   |
| NR_132346.1 | 0.352115 | -1.50588 | 0.016989 | 0.910542 | Down |
| NR_132748.1 | 8.453787 | 3.079598 | 0.018577 | 0.919714 | Up   |
| NR_132781.1 | 270.6579 | 8.080327 | 0.038703 | 0.999158 | Up   |
| NR_132996.1 | 6.466777 | 2.693047 | 0.034111 | 0.999158 | Up   |
| NR_134302.1 | 2.540847 | 1.34531  | 0.039875 | 0.999158 | Up   |
| NR_134594.1 | 39.84107 | 5.316184 | 0.020207 | 0.946466 | Up   |
| NR_134915.1 | 0.048701 | -4.35991 | 0.043559 | 0.999158 | Down |
| NR_135087.1 | 0.014344 | -6.12345 | 0.003042 | 0.549611 | Down |
| NR_135290.1 | 25.7876  | 4.688606 | 0.036908 | 0.999158 | Up   |
| NR_137182.1 | 0.055967 | -4.15927 | 0.039099 | 0.999158 | Down |
| NR_138145.1 | 0.247454 | -2.01477 | 0.00147  | 0.351907 | Down |
| NR_138258.1 | 0.018637 | -5.74573 | 0.029919 | 0.999158 | Down |
| NR_146320.1 | 11.31295 | 3.499903 | 0.043982 | 0.999158 | Up   |
| NR_146590.1 | 1.877557 | 0.908857 | 0.038484 | 0.999158 | Up   |
| NR_147505.1 | 0.158264 | -2.65959 | 0.03086  | 0.999158 | Down |
| NR_147886.1 | 0.101769 | -3.29662 | 0.025753 | 0.999158 | Down |
| NR_148945.1 | 1.593038 | 0.671781 | 0.023966 | 0.999158 | Up   |



|                |          |          |          |          |      |
|----------------|----------|----------|----------|----------|------|
| NR_152525.1    | 16.76637 | 4.067499 | 0.004522 | 0.58394  | Up   |
| NR_152533.1    | 73.71736 | 6.203933 | 0.023053 | 0.993627 | Up   |
| NR_152580.1    | 3.469306 | 1.794647 | 0.012115 | 0.832721 | Up   |
| NR_152738.1    | 0.071672 | -3.80245 | 0.012042 | 0.832721 | Down |
| NR_152798.1    | 4.954612 | 2.308772 | 0.003733 | 0.55619  | Up   |
| NR_152799.1    | 81.00384 | 6.339918 | 0.031395 | 0.999158 | Up   |
| NR_152810.1    | 129.1673 | 7.013097 | 4.80E-05 | 0.04698  | Up   |
| NR_152820.1    | 0.357987 | -1.48202 | 0.0066   | 0.711004 | Down |
| NR_152825.1    | 0.473092 | -1.07981 | 0.035679 | 0.999158 | Down |
| TCONS_00000210 | 1.680734 | 0.749091 | 0.046551 | 0.999158 | Up   |
| TCONS_00000698 | 0.002172 | -8.84679 | 8.24E-08 | 0.000263 | Down |
| TCONS_00000811 | 0.230621 | -2.1164  | 0.04152  | 0.999158 | Down |
| TCONS_00005058 | 3.335566 | 1.737932 | 0.018164 | 0.919714 | Up   |
| TCONS_00006476 | 2.194615 | 1.133968 | 0.019308 | 0.920628 | Up   |
| TCONS_00010067 | 3.71E-07 | -21.3615 | 2.12E-12 | 2.28E-08 | Down |
| TCONS_00013979 | 0.010895 | -6.52017 | 0.009172 | 0.787987 | Down |
| TCONS_00016413 | 0.617466 | -0.69557 | 0.011374 | 0.822346 | Down |
| TCONS_00016416 | 0.665955 | -0.5865  | 0.028143 | 0.999158 | Down |
| TCONS_00016420 | 3.328437 | 1.734845 | 3.92E-05 | 0.045984 | Up   |
| TCONS_00016430 | 0.598507 | -0.74056 | 0.028406 | 0.999158 | Down |
| TCONS_00016446 | 0.073499 | -3.76613 | 0.011662 | 0.82653  | Down |
| TCONS_00016454 | 0.599132 | -0.73905 | 0.003141 | 0.549611 | Down |
| TCONS_00017243 | 8.65127  | 3.112912 | 0.048698 | 0.999158 | Up   |
| TCONS_00022196 | 1880161  | 20.84242 | 9.75E-08 | 0.000263 | Up   |
| TCONS_00022677 | 1.544853 | 0.62747  | 0.010059 | 0.789566 | Up   |
| TCONS_00023887 | 1.686923 | 0.754394 | 0.014481 | 0.866453 | Up   |
| TCONS_00025095 | 2.978272 | 1.574475 | 0.016333 | 0.910542 | Up   |
| TCONS_00025858 | 0.008675 | -6.84898 | 0.000678 | 0.208568 | Down |
| XR_001737712.1 | 1.544688 | 0.627316 | 0.008105 | 0.778009 | Up   |
| XR_001738201.1 | 0.133278 | -2.90749 | 0.030668 | 0.999158 | Down |
| XR_001739129.1 | 14.55793 | 3.863733 | 0.044233 | 0.999158 | Up   |
| XR_001739483.1 | 0.365069 | -1.45376 | 0.005007 | 0.62723  | Down |
| XR_001739540.1 | 0.018373 | -5.76627 | 0.006886 | 0.734497 | Down |
| XR_001739646.1 | 2.368261 | 1.243828 | 0.014558 | 0.866453 | Up   |
| XR_001740466.2 | 4.98228  | 2.316806 | 0.000854 | 0.23588  | Up   |
| XR_001740875.2 | 0.153618 | -2.70258 | 0.033392 | 0.999158 | Down |
| XR_001741431.1 | 2.146215 | 1.101795 | 0.022911 | 0.993627 | Up   |
| XR_001741555.1 | 0.006356 | -7.2976  | 4.88E-07 | 0.001028 | Down |
| XR_001741723.1 | 33.39344 | 5.061493 | 0.023195 | 0.993627 | Up   |
| XR_001744266.2 | 0.040666 | -4.62003 | 0.00273  | 0.539616 | Down |
| XR_001745175.1 | 1.712416 | 0.776033 | 0.030803 | 0.999158 | Up   |

|                |          |          |          |          |      |
|----------------|----------|----------|----------|----------|------|
| XR_001745395.1 | 0.038926 | -4.68312 | 0.017103 | 0.91215  | Down |
| XR_001746149.2 | 4.66864  | 2.223002 | 0.002777 | 0.539616 | Up   |
| XR_001746732.2 | 4.065681 | 2.023497 | 0.044979 | 0.999158 | Up   |
| XR_001746959.2 | 0.057494 | -4.12045 | 0.044535 | 0.999158 | Down |
| XR_001747329.1 | 0.09694  | -3.36676 | 0.037093 | 0.999158 | Down |
| XR_001747440.1 | 6.157139 | 2.62226  | 0.025453 | 0.999158 | Up   |
| XR_001747598.1 | 6.37864  | 2.673249 | 0.014042 | 0.866453 | Up   |
| XR_001748100.1 | 0.258558 | -1.95144 | 0.044021 | 0.999158 | Down |
| XR_001749012.1 | 0.589107 | -0.7634  | 0.025357 | 0.999158 | Down |
| XR_001749031.1 | 3.614537 | 1.853811 | 0.00102  | 0.274589 | Up   |
| XR_001749100.1 | 0.252335 | -1.98659 | 0.037197 | 0.999158 | Down |
| XR_001749102.1 | 0.247361 | -2.01531 | 0.041317 | 0.999158 | Down |
| XR_001749149.1 | 11.74908 | 3.554476 | 0.034173 | 0.999158 | Up   |
| XR_001749294.1 | 0.200985 | -2.31484 | 0.049928 | 0.999158 | Down |
| XR_001749298.1 | 0.259173 | -1.94801 | 0.01643  | 0.910542 | Down |
| XR_001749299.1 | 5.202306 | 2.379151 | 0.046923 | 0.999158 | Up   |
| XR_001749785.1 | 13.8022  | 3.786826 | 0.024567 | 0.999158 | Up   |
| XR_001750974.1 | 44.41802 | 5.473073 | 0.045102 | 0.999158 | Up   |
| XR_001751642.1 | 14.47176 | 3.855168 | 0.019107 | 0.920628 | Up   |
| XR_001752318.2 | 0.640779 | -0.6421  | 0.039627 | 0.999158 | Down |
| XR_001752718.2 | 0.021012 | -5.57263 | 0.038094 | 0.999158 | Down |
| XR_001753092.2 | 2.593631 | 1.374973 | 0.037086 | 0.999158 | Up   |
| XR_001754469.2 | 0.015426 | -6.01848 | 0.018828 | 0.919714 | Down |
| XR_001754566.1 | 16.42799 | 4.038084 | 0.013331 | 0.852565 | Up   |
| XR_001754953.1 | 0.036463 | -4.77742 | 0.014144 | 0.866453 | Down |
| XR_001755026.2 | 0.091993 | -3.44233 | 0.004607 | 0.58394  | Down |
| XR_001755487.1 | 29.80694 | 4.897576 | 0.025294 | 0.999158 | Up   |
| XR_001755788.1 | 99.68193 | 6.63926  | 0.000266 | 0.124404 | Up   |
| XR_001755960.2 | 0.350967 | -1.51059 | 0.033816 | 0.999158 | Down |
| XR_002956216.1 | 0.231684 | -2.10977 | 0.03625  | 0.999158 | Down |
| XR_002956362.1 | 69.88523 | 6.126916 | 0.001804 | 0.413546 | Up   |
| XR_002956368.1 | 1.633217 | 0.707717 | 0.044381 | 0.999158 | Up   |
| XR_002956527.1 | 0.064755 | -3.94886 | 0.003783 | 0.55619  | Down |
| XR_002956578.1 | 22.07967 | 4.464647 | 0.020588 | 0.953562 | Up   |
| XR_002956729.1 | 0.37012  | -1.43393 | 0.000506 | 0.18602  | Down |
| XR_002957586.1 | 0.260853 | -1.93869 | 0.012213 | 0.832721 | Down |
| XR_002957604.1 | 0.07382  | -3.75985 | 0.034642 | 0.999158 | Down |
| XR_002957710.1 | 3.004741 | 1.587241 | 0.017458 | 0.919714 | Up   |
| XR_002957877.1 | 0.021528 | -5.53762 | 0.047828 | 0.999158 | Down |
| XR_002958195.1 | 0.056807 | -4.13779 | 0.007646 | 0.764102 | Down |
| XR_002958423.1 | 0.018478 | -5.75808 | 0.000234 | 0.116859 | Down |

|                |          |          |          |          |      |
|----------------|----------|----------|----------|----------|------|
| XR_002958445.1 | 7.668458 | 2.938937 | 0.001198 | 0.300072 | Up   |
| XR_002958529.1 | 0.105204 | -3.24874 | 0.029475 | 0.999158 | Down |
| XR_002958570.1 | 0.090227 | -3.47029 | 0.047743 | 0.999158 | Down |
| XR_002959441.1 | 0.008552 | -6.86946 | 0.003367 | 0.549611 | Down |
| XR_002959446.1 | 64.10546 | 6.002375 | 0.018213 | 0.919714 | Up   |
| XR_427154.4    | 32.84494 | 5.037599 | 0.021673 | 0.98518  | Up   |
| XR_429965.3    | 26.47751 | 4.726695 | 0.007068 | 0.739247 | Up   |
| XR_923257.3    | 0.376591 | -1.40893 | 0.044953 | 0.999158 | Down |
| XR_926349.2    | 40.38721 | 5.335826 | 0.016701 | 0.910542 | Up   |
| XR_926624.3    | 0.058848 | -4.08685 | 0.005926 | 0.679104 | Down |
| XR_927172.3    | 0.167392 | -2.5787  | 0.009829 | 0.789566 | Down |
| XR_927952.3    | 0.353725 | -1.4993  | 0.00912  | 0.787987 | Down |
| XR_929618.3    | 0.171805 | -2.54115 | 0.002131 | 0.468537 | Down |
| XR_930134.2    | 0.01753  | -5.83406 | 0.005507 | 0.66664  | Down |
| XR_930176.2    | 0.036158 | -4.78952 | 0.045074 | 0.999158 | Down |
| XR_930276.3    | 0.010709 | -6.54497 | 0.008641 | 0.778009 | Down |
| XR_930803.2    | 0.101251 | -3.304   | 0.046018 | 0.999158 | Down |
| XR_931667.2    | 0.168653 | -2.56787 | 0.035433 | 0.999158 | Down |
| XR_933035.3    | 25.37613 | 4.6654   | 0.048298 | 0.999158 | Up   |
| XR_933690.2    | 0.019863 | -5.65376 | 0.008289 | 0.778009 | Down |
| XR_936802.2    | 36.4726  | 5.188741 | 0.011591 | 0.82653  | Up   |
| XR_939886.2    | 6.221562 | 2.637277 | 0.021086 | 0.962533 | Up   |
| XR_939896.2    | 7.396597 | 2.886862 | 0.025533 | 0.999158 | Up   |
| XR_940258.2    | 0.110722 | -3.17498 | 0.048347 | 0.999158 | Down |
| XR_940325.2    | 0.162198 | -2.62417 | 0.008131 | 0.778009 | Down |
| XR_940570.2    | 0.109109 | -3.19615 | 0.002844 | 0.539616 | Down |
| XR_940788.3    | 0.016247 | -5.94364 | 0.006308 | 0.693412 | Down |
| XR_940911.2    | 27.44774 | 4.778616 | 0.046906 | 0.999158 | Up   |
| XR_945302.2    | 4.778646 | 2.256602 | 0.00766  | 0.764102 | Up   |
| XR_945304.2    | 0.02432  | -5.3617  | 0.00109  | 0.286381 | Down |
| XR_947755.2    | 11.97777 | 3.582287 | 0.023243 | 0.993627 | Up   |
| XR_947991.2    | 2.884109 | 1.528126 | 0.000151 | 0.099259 | Up   |
| XR_948815.2    | 0.101949 | -3.29408 | 0.010187 | 0.789566 | Down |
| XR_949653.3    | 0.508184 | -0.97658 | 0.010045 | 0.789566 | Down |
| XR_950154.2    | 0.407014 | -1.29685 | 0.031992 | 0.999158 | Down |
| XR_950234.3    | 0.396888 | -1.3332  | 0.002294 | 0.479941 | Down |
| XR_950387.3    | 0.498021 | -1.00572 | 0.038959 | 0.999158 | Down |

---

**Supplementary Table S3** The top 10 lncRNAs in the CNC network according to topological parameters

| Transcript ID   | Degree | EPC     | Closeness | Radiality |
|-----------------|--------|---------|-----------|-----------|
| ENST00000576232 | 134    | 259.161 | 362.33333 | 4.09593   |
| ENST00000642173 | 133    | 267.175 | 362.91667 | 4.10894   |
| ENST00000627824 | 133    | 258.476 | 361.66667 | 4.09268   |
| ENST00000608576 | 130    | 255.776 | 359.66667 | 4.08293   |
| NR_135290.1     | 130    | 257.625 | 360.91667 | 4.09919   |
| NR_024462.1     | 125    | 252.698 | 355.08333 | 4.05041   |
| ENST00000649291 | 124    | 253.22  | 356.66667 | 4.07642   |
| ENST00000648279 | 121    | 251.916 | 351.91667 | 4.03089   |
| ENST00000432142 | 119    | 248.62  | 350.08333 | 4.01789   |
| ENST00000610631 | 118    | 242.234 | 350.91667 | 4.03415   |

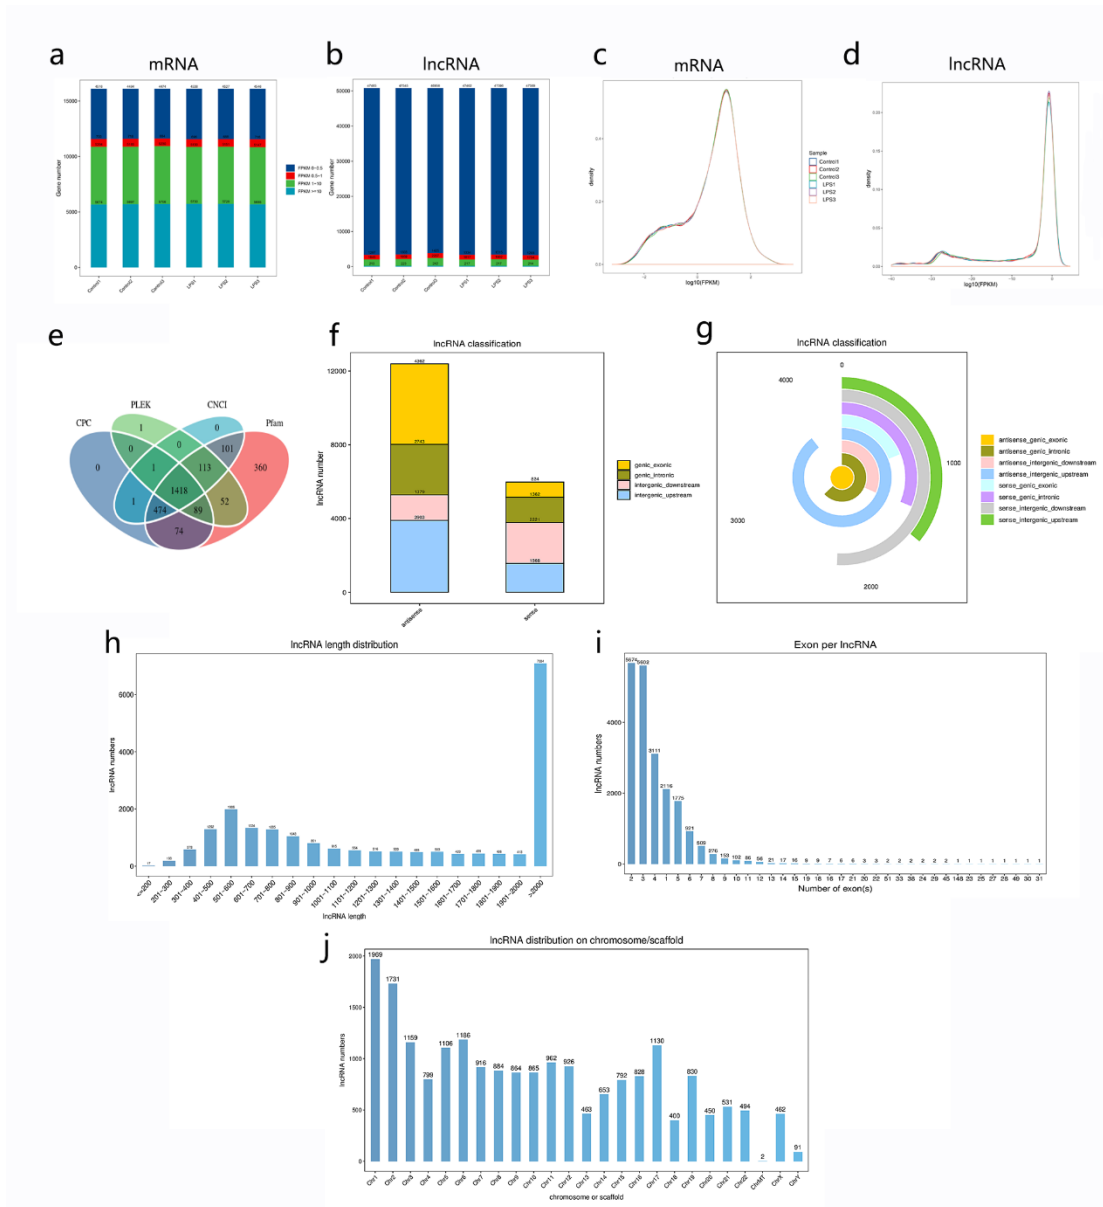

**Supplementary Figure S1** LncRNA and mRNA characteristics in BEAS-2B cells. **(a,b)** FPKM values distribution of mRNA and lncRNA. **(c,d)** Gene expression density of mRNA and lncRNA. **(e)** Prediction of novel lncRNAs by 4 algorithms. **(f,g)** LncRNA classification. **(h)** LncRNA length distribution. **(i)** Number of exons for lncRNA. **(j)** LncRNA distribution on chromosomes.
